# Supplementary material
Source: ML conference proceedings conference paper supplement (https://proceedings.mlr.press/v139/zhu21e.html)
Supplement: Supplementary file 1 [file zhu21e-supp.pdf]

## Appendix

The Appendix is organized as follows.

- Section A presents the detailed examples and derivations of consensus equations.
- Section B includes proofs and other details about our theoretical results. Particularly,
  - Section B.1 proves the uniqueness of  $T$ .
  - Section B.2 justifies the feasibility of assumption  $|E_3^*| = \Theta(N)$
  - Section B.3 shows the proof for Lemma 1
  - Section B.4 shows the proof for Theorem 2.
- Section C presents more discussions, e.g., the soft 2-NN label clusterability, more details on local  $T(X)$ , and the feasibility of our Assumption 1 & 2 to guarantee the uniqueness of  $T$ .
- Section D shows more experimental settings and results.

### A. Derivation of Consensus Equations

For the first-order consensus, we have

$$\mathbb{P}(\tilde{Y}_1 = j_1) = \sum_{i \in [K]} \mathbb{P}(\tilde{Y}_1 = j_1 | Y_1 = i) \mathbb{P}(Y_1 = i).$$

For the second-order consensus, we have

$$\begin{aligned} & \mathbb{P}(\tilde{Y}_1 = j_1, \tilde{Y}_2 = j_2) \\ &= \sum_{i \in [K]} \mathbb{P}(\tilde{Y}_1 = j_1, \tilde{Y}_2 = j_2 | Y_1 = i, Y_2 = i) \mathbb{P}(Y_1 = Y_2 = i) \\ &\stackrel{(a)}{=} \sum_{i \in [K]} \mathbb{P}(\tilde{Y}_1 = j_1, \tilde{Y}_2 = j_2 | Y_1 = i, Y_2 = i) \cdot \mathbb{P}(Y_1 = i) \\ &\stackrel{(b)}{=} \sum_{i \in [K]} \mathbb{P}(\tilde{Y}_1 = j_1 | Y_1 = i) \cdot \mathbb{P}(\tilde{Y}_2 = j_2 | Y_2 = i) \cdot \mathbb{P}(Y_1 = i), \end{aligned}$$

where equality (a) holds due to the 2-NN label clusterability, i.e.,  $Y_1 = Y_2 (= Y_3)$  w.p. 1, and equality (b) holds due to the conditional independency between  $\tilde{Y}_1$  and  $\tilde{Y}_2$  given their clean labels.

For the third-order consensus, we have

$$\begin{aligned} & \mathbb{P}(\tilde{Y}_1 = j_1, \tilde{Y}_2 = j_2, \tilde{Y}_3 = j_3) \\ &= \sum_{i \in [K]} \mathbb{P}(\tilde{Y}_1 = j_1, \tilde{Y}_2 = j_2, \tilde{Y}_3 = j_3 | Y_1 = i, Y_2 = i, Y_3 = i) \mathbb{P}(Y_1 = Y_2 = Y_3 = i) \\ &\stackrel{(a)}{=} \sum_{i \in [K]} \mathbb{P}(\tilde{Y}_1 = j_1, \tilde{Y}_2 = j_2, \tilde{Y}_3 = j_3 | Y_1 = i, Y_2 = i, Y_3 = i) \mathbb{P}(Y_1 = i) \\ &\stackrel{(b)}{=} \sum_{i \in [K]} \mathbb{P}(\tilde{Y}_1 = j_1 | Y_1 = i) \mathbb{P}(\tilde{Y}_2 = j_2 | Y_2 = i) \mathbb{P}(\tilde{Y}_3 = j_3 | Y_3 = i) \mathbb{P}(Y_1 = i). \end{aligned}$$

where equality (a) holds due to the 3-NN label clusterability, i.e.,  $Y_1 = Y_2 = Y_3$  w.p. 1, and equality (b) holds due to the conditional independency between  $\tilde{Y}_1$ ,  $\tilde{Y}_2$  and  $\tilde{Y}_3$  given their clean labels.

With the above analyses, there are 2 first-order equations,

$$\begin{aligned} \mathbb{P}(\tilde{Y}_1 = 1) &= p_1(1 - e_1) + (1 - p_1)e_2, \\ \mathbb{P}(\tilde{Y}_1 = 2) &= p_1e_1 + (1 - p_1)(1 - e_2). \end{aligned}$$

There are 4 second-order equations for different combinations of  $\tilde{Y}_1, \tilde{Y}_2$ , e.g.,

$$\begin{aligned}\mathbb{P}(\tilde{Y}_1 = 1, \tilde{Y}_2 = 1) &= p_1(1 - e_1)^2 + (1 - p_1)e_2^2, \\ \mathbb{P}(\tilde{Y}_1 = 1, \tilde{Y}_2 = 2) &= p_1(1 - e_1)e_1 + (1 - p_1)e_2(1 - e_2), \\ \mathbb{P}(\tilde{Y}_1 = 2, \tilde{Y}_2 = 1) &= p_1(1 - e_1)e_1 + (1 - p_1)e_2(1 - e_2), \\ \mathbb{P}(\tilde{Y}_1 = 1, \tilde{Y}_2 = 1) &= p_1e_1^2 + (1 - p_1)(1 - e_2)^2.\end{aligned}$$

There are 8 third-order equations for different combinations of  $\tilde{Y}_1, \tilde{Y}_2, \tilde{Y}_3$ , e.g.,

$$\begin{aligned}\mathbb{P}(\tilde{Y}_1 = 1, \tilde{Y}_2 = 1, \tilde{Y}_3 = 1) &= p_1(1 - e_1)^3 + (1 - p_1)e_2^3, \\ \mathbb{P}(\tilde{Y}_1 = 1, \tilde{Y}_2 = 1, \tilde{Y}_3 = 2) &= p_1(1 - e_1)^2e_1 + (1 - p_1)e_2^2(1 - e_2), \\ \mathbb{P}(\tilde{Y}_1 = 1, \tilde{Y}_2 = 2, \tilde{Y}_3 = 1) &= p_1(1 - e_1)^2e_1 + (1 - p_1)e_2^2(1 - e_2), \\ \mathbb{P}(\tilde{Y}_1 = 1, \tilde{Y}_2 = 2, \tilde{Y}_3 = 2) &= p_1(1 - e_1)e_1^2 + (1 - p_1)e_2(1 - e_2)^2, \\ \mathbb{P}(\tilde{Y}_1 = 2, \tilde{Y}_2 = 1, \tilde{Y}_3 = 1) &= p_1(1 - e_1)^2e_1 + (1 - p_1)e_2^2(1 - e_2), \\ \mathbb{P}(\tilde{Y}_1 = 2, \tilde{Y}_2 = 1, \tilde{Y}_3 = 2) &= p_1(1 - e_1)e_1^2 + (1 - p_1)e_2(1 - e_2)^2, \\ \mathbb{P}(\tilde{Y}_1 = 2, \tilde{Y}_2 = 2, \tilde{Y}_3 = 1) &= p_1(1 - e_1)e_1^2 + (1 - p_1)e_2(1 - e_2)^2, \\ \mathbb{P}(\tilde{Y}_1 = 2, \tilde{Y}_2 = 2, \tilde{Y}_3 = 2) &= p_1e_1^3 + (1 - p_1)(1 - e_2)^3.\end{aligned}$$

For a general  $K$ -class classification problem, we show one first-order consensus below:

$$\begin{aligned}\mathbf{e}_j^\top \mathbf{c}^{[1]} &= \mathbb{P}(\tilde{Y}_1 = j) \\ &= \sum_{i \in [K]} \mathbb{P}(\tilde{Y}_1 = j | Y_1 = i) \mathbb{P}(Y_1 = i) \\ &= \sum_{i \in [K]} T_{ij} \cdot p_i = \mathbf{e}_j^\top \mathbf{T}^\top \mathbf{p}.\end{aligned}$$

The second-order consensus follows the example below:

$$\begin{aligned}\mathbf{e}_j^\top \mathbf{c}_r^{[2]} &= \mathbb{P}(\tilde{Y}_1 = j, \tilde{Y}_2 = (j + r)_K) \\ &\stackrel{(a)}{=} \sum_{i \in [K]} \mathbb{P}(\tilde{Y}_1 = j | Y_1 = i) \mathbb{P}(\tilde{Y}_2 = (j + r)_K | Y_2 = i) \mathbb{P}(Y_1 = i) \\ &= \sum_{i \in [K]} T_{i,j} \cdot T_{i,(j+r)_K} \cdot p_i \stackrel{(b)}{=} \mathbf{e}_j^\top (\mathbf{T} \circ \mathbf{T}_r)^\top \mathbf{p},\end{aligned}$$

where equality (a) holds again due to the 2-NN label clusterability the conditional independency (similar to binary cases), and equality (b) holds due to  $\mathbf{T}_r[i, j] = T_{i,(j+r)_K}$ . We also show one third-order consensus below:

$$\begin{aligned}\mathbf{e}_j^\top \mathbf{c}_r^{[3]} &= \mathbb{P}(\tilde{Y}_1 = j, \tilde{Y}_2 = (j + r)_K, \tilde{Y}_3 = (j + s)_K) \\ &\stackrel{(a)}{=} \sum_{i \in [K]} \mathbb{P}(\tilde{Y}_1 = j | Y_1 = i) \mathbb{P}(\tilde{Y}_2 = (j + r)_K | Y_2 = i) \mathbb{P}(\tilde{Y}_3 = (j + s)_K | Y_3 = i) \mathbb{P}(Y_1 = i) \\ &= \sum_{i \in [K]} T_{i,j} \cdot T_{i,(j+r)_K} \cdot T_{i,(j+s)_K} \cdot p_i \stackrel{(b)}{=} \mathbf{e}_j^\top (\mathbf{T} \circ \mathbf{T}_r \circ \mathbf{T}_s)^\top \mathbf{p},\end{aligned}$$

where equality (a) holds again due to the 3-NN label clusterability the conditional independency (similar to binary cases), and equality (b) holds due to  $\mathbf{T}_r[i, j] = T_{i,(j+r)_K}$ ,  $\mathbf{T}_s[i, j] = T_{i,(j+s)_K}$ .

## B. Theoretical Guarantees

### B.1. Uniqueness of $T$

We need to prove the following equations have a unique solution when  $T$  is non-singular and informative.

#### Consensus Equations

- First-order ( $K$  equations):

$$\mathbf{c}^{[1]} := T^\top \mathbf{p},$$

- Second-order ( $K^2$  equations):

$$\mathbf{c}_r^{[2]} := (T \circ T_r)^\top \mathbf{p}, \quad r \in [K],$$

- Third-order ( $K^3$  equations):

$$\mathbf{c}_{r,s}^{[3]} := (T \circ T_r \circ T_s)^\top \mathbf{p}, \quad r, s \in [K].$$

Firstly, we need the following Lemma for the Hadamard product of matrices:

**Lemma 2.** (*Horn & Johnson, 2012*) For column vectors  $\mathbf{x}$  and  $\mathbf{y}$ , and corresponding diagonal matrices  $D_{\mathbf{x}}$  and  $D_{\mathbf{y}}$  with these vectors as their main diagonals, the following identity holds:

$$\mathbf{x}^*(A \circ B)\mathbf{y} = \text{tr}(D_{\mathbf{x}}^* A D_{\mathbf{y}} B^\top),$$

where  $\mathbf{x}^*$  denotes the conjugate transpose of  $\mathbf{x}$ .

The following proof focuses on the second and third-order consensus. It is worth noting that, although the first-order consensus is not necessary for the derivation of the unique solution, it still helps improve the stability of solving for  $T$  and  $\mathbf{p}$  numerically.

**Step I: Transform the second-order equations.** Denoted by  $T_r = T S_r$ , where  $S_r$  permutes particular columns of  $T$ . Let  $\mathbf{e}_i$  be the column vector with only the  $i$ -th element being 1 and 0 otherwise. With Lemma 2, the second-order consensus can be transformed as

$$\mathbf{e}_i^\top \mathbf{c}_r^{[2]} = \mathbf{e}_i^\top (T \circ T_r)^\top \mathbf{p} = \text{tr}(D_{\mathbf{e}_i} T^\top D_{\mathbf{p}} T S_r)$$

Then the  $(i, (i+r)_K)$ -th element of matrix  $T^\top D_{\mathbf{p}} T$  is

$$(T^\top D_{\mathbf{p}} T)[i, (i+r)_K] = \mathbf{e}_i^\top \mathbf{c}_r^{[2]}.$$

With a fixed  $\mathbf{e}_i^\top \mathbf{c}_r^{[2]}, \forall i, r \in [K]$ , denote by

$$T^\top D_{\mathbf{p}} T = T_\dagger, \quad (11)$$

where  $T_\dagger[i, (i+r)_K] = \mathbf{e}_i^\top \mathbf{c}_r^{[2]}$ . Note  $T_\dagger$  is fixed given  $\mathbf{c}_r^{[2]}, \forall r \in [K]$ .

**Step II: Transform the third-order equations.** Following the idea in Step I, we can also transform the third-order equations. First, notice that

$$\mathbf{e}_i^\top \mathbf{c}_{r,s}^{[3]} = \mathbf{e}_i^\top [(T \circ T_s) \circ T_r]^\top \mathbf{p} = \text{tr}(D_{\mathbf{e}_i} (T \circ T_s)^\top D_{\mathbf{p}} T S_r).$$

Then the  $(i, (i+r)_K)$ -th element of matrix  $(T \circ T_s)^\top D_{\mathbf{p}} T$  is

$$((T \circ T_s)^\top D_{\mathbf{p}} T)[i, (i+r)_K] = \mathbf{e}_i^\top \mathbf{c}_{r,s}^{[3]}.$$

With a fixed  $\mathbf{e}_i^\top \mathbf{c}_{r,s}^{[3]}, \forall i, r \in [K]$ , denote by

$$(T \circ T_s)^\top D_{\mathbf{p}} T = T_{\dagger,s} \Rightarrow T^\top D_{\mathbf{p}} (T \circ T_s) = T_{\dagger,s}^\top, \quad (12)$$

where  $\mathbf{T}_{\dagger,s}[i, (i+r)_K] = \mathbf{e}_i^\top \mathbf{c}_{r,s}^{[3]}$ . According to Eqn. (11), we have

$$\mathbf{T}^\top \mathbf{D}_p(\mathbf{T} \circ \mathbf{T}_s) = \mathbf{T}^\top \mathbf{D}_p \mathbf{T} \mathbf{T}^{-1}(\mathbf{T} \circ \mathbf{T}_s) = \mathbf{T}_{\dagger}^\top \mathbf{T}^{-1}(\mathbf{T} \circ \mathbf{T}_s) = \mathbf{T}_{\dagger,s}^\top.$$

Thus

$$(\mathbf{T} \circ \mathbf{T}_s) = \mathbf{T} \mathbf{T}_{\dagger}^{-1} \mathbf{T}_{\dagger,s}^\top, \forall s \in [K]. \quad (13)$$

**Step III: From matrices to vectors** With Step I and Step II, we could transform the equations formulated by the second and the third-order consensus to a particular system of multivariate quadratic equations of  $\mathbf{T}$  in Eqn. (13). Generally, these equations could have up to  $2^{K^2}$  solutions introduced by different combinations of each element in  $\mathbf{T}$ . To prove the uniqueness of  $\mathbf{T}$ , we need to exploit the structure of the equations in (13).

For a clear representation of the structure of equations and solutions, we first consider one subset of the equations in (13). Specifically, let  $s = 0$  we have

$$(\mathbf{T} \circ \mathbf{T}) = \mathbf{T} \mathbf{T}_{\dagger}^{-1} \mathbf{T}_{\dagger}^\top. \quad (14)$$

Then we need to study the number of feasible  $\mathbf{T}$  satisfying Eqn. (14). Denote by  $\mathbf{A} = \mathbf{T}_{\dagger}(\mathbf{T}_{\dagger}^{-1})^\top$ . Then each row of  $\mathbf{T}$ , denoted by  $\mathbf{u}^\top$ , is a solution to the equation

$$\mathbf{A}\mathbf{u} = \mathbf{D}_u \mathbf{u} \quad (\text{a.k.a. } \mathbf{A}\mathbf{u} = \mathbf{u} \circ \mathbf{u}). \quad (15)$$

Till now, in Step III, we split the matrix  $\mathbf{T}$  to several vectors  $\mathbf{u}$ , and transform our target from finding a matrix solution  $\mathbf{T}$  for (13) to a set of vector solutions  $\mathbf{u}$  for (15).

Assume there are  $M$  feasible  $\mathbf{u}$  vectors. We collect all the possible  $\mathbf{u}$  and define  $\mathbf{U} := [\mathbf{u}_1, \mathbf{u}_2, \dots, \mathbf{u}_M]$ ,  $\mathbf{u}_i \neq \mathbf{u}_{i'}, \forall i, i' \in [M]$ . If  $M = K$ , we know there exists at most  $K!$  different  $\mathbf{T}$  (considering all the possible permutations of  $\mathbf{u}$ ) that Eqn. (14) holds. Further, by considering an informative  $\mathbf{T}$  as Assumption 2, we can identify a particular permutation. Therefore, if  $M = K$  and  $\mathbf{T}$  is informative, we know there exists and only exists one unique  $\mathbf{T}$  that Eqn. (14) holds.

**Step IV: Constructing the  $M$ -th vector** Supposing  $M > K$ , we have

$$\mathbf{A}\mathbf{U} = \mathbf{A}[\mathbf{u}_1, \mathbf{u}_2, \dots, \mathbf{u}_K, \dots, \mathbf{u}_M] = [\mathbf{D}_{\mathbf{u}_1} \mathbf{u}_1, \mathbf{D}_{\mathbf{u}_2} \mathbf{u}_2, \dots, \mathbf{D}_{\mathbf{u}_K} \mathbf{u}_K, \dots, \mathbf{D}_{\mathbf{u}_M} \mathbf{u}_M].$$

With a non-singular  $\mathbf{T}$  (Assumption 1), without loss of generality, we will assume the first  $K$  columns are full-rank. Then  $\mathbf{u}_M$  must be a linear combination of the first  $K$  columns, i.e.,  $\mathbf{u}_M = \sum_{i \in [K]} \lambda_i \mathbf{u}_i = \mathbf{U} \boldsymbol{\lambda}_0$ , where  $\boldsymbol{\lambda}_0 = [\lambda_1, \lambda_2, \dots, \lambda_K, 0, \dots, 0]$ . According to the equation  $\mathbf{A}\mathbf{u} = \mathbf{D}_u \mathbf{u} = \mathbf{u} \circ \mathbf{u}$ , we have

$$\mathbf{A}\mathbf{u}_M = \mathbf{D}_{\mathbf{u}_M} \mathbf{u}_M = \mathbf{D}_{\mathbf{U}\boldsymbol{\lambda}_0} \mathbf{U}\boldsymbol{\lambda}_0,$$

and

$$\mathbf{A}\mathbf{u}_M = \sum_{i \in [M]} \lambda_0[i] \mathbf{A}\mathbf{u}_i = \sum_{i \in [M]} \lambda_0[i] \mathbf{u}_i \circ \mathbf{u}_i = (\mathbf{U} \circ \mathbf{U}) \boldsymbol{\lambda}_0.$$

Thus

$$(\mathbf{U} \circ \mathbf{U}) \boldsymbol{\lambda}_0 = \mathbf{D}_{\mathbf{U}\boldsymbol{\lambda}_0} \mathbf{U}\boldsymbol{\lambda}_0 = (\mathbf{U}\boldsymbol{\lambda}_0) \circ (\mathbf{U}\boldsymbol{\lambda}_0).$$

Note that, the matrix  $\mathbf{U}$  can be written as  $\mathbf{U} = [\mathbf{U}_K, \mathbf{U}_{M-K}]$ , and the vector  $\boldsymbol{\lambda}_0$  can be written as  $\boldsymbol{\lambda}_0 = [\boldsymbol{\lambda}^\top, 0, \dots, 0]^\top$ , where  $\boldsymbol{\lambda} := [\lambda_1, \dots, \lambda_K]^\top$ . Then the above equation can be transformed as follows:

$$(\mathbf{U}_K \circ \mathbf{U}_K) \boldsymbol{\lambda} = \mathbf{u}_M \circ \mathbf{u}_M, \text{ and } \mathbf{U}_K \boldsymbol{\lambda} = \mathbf{u}_M.$$

Similarly,  $\forall s \in [K]$ , we have

$$(\mathbf{U}_K \circ (\bar{\mathbf{S}}_s \mathbf{U}_K)) \boldsymbol{\lambda} = \mathbf{u}_M \circ (\bar{\mathbf{S}}_s \mathbf{u}_M), \text{ and } \mathbf{U}_K \boldsymbol{\lambda} = \mathbf{u}_M,$$

where  $\bar{\mathbf{S}}_s \mathbf{u}_M$  denotes a row circular shift such that  $(\bar{\mathbf{S}}_s \mathbf{u}_M)[i] = \mathbf{u}_M[i+s]$ . Note  $\bar{\mathbf{S}}_s = \mathbf{S}_s^\top$ . Applying Lemma 2, we have

$$\text{tr}(\mathbf{D}_{\mathbf{e}_i} \mathbf{U}_K \mathbf{D}_\lambda \mathbf{U}_K^\top \bar{\mathbf{S}}_s^\top) = \text{tr}(\mathbf{D}_{\mathbf{e}_i} \mathbf{U}_K \mathbf{D}_\lambda \mathbf{U}_K^\top \mathbf{S}_s) = (\mathbf{u}_M \circ (\bar{\mathbf{S}}_s \mathbf{u}_M))[i]$$

Then the  $(i, (i + s)_K)$ -th element of matrix  $\mathbf{U}_K \mathbf{D}_\lambda \mathbf{U}_K^\top$  is

$$(\mathbf{U}_K \mathbf{D}_\lambda \mathbf{U}_K^\top)[i, (i + s)_K] = (\mathbf{u}_M \circ (\bar{\mathbf{S}}_s \mathbf{u}_M))[i] = \mathbf{u}_M[i] \cdot \mathbf{u}_M[(i + s)_K].$$

Then we have

$$\mathbf{U}_K \mathbf{D}_\lambda \mathbf{U}_K^\top = \mathbf{Q}, \text{ and } \mathbf{Q} = \mathbf{u}_M \mathbf{u}_M^\top.$$

When  $\mathbf{T}$  is non-singular, we know  $\mathbf{U}$  is invertible (full-rank), then

$$\mathbf{D}_\lambda = (\mathbf{U}_K^{-1} \mathbf{u}_M)(\mathbf{U}_K^{-1} \mathbf{u}_M)^\top.$$

Thus  $\text{Rank}(\mathbf{D}_\lambda) = 1$ . Recalling  $\mathbf{1}^\top \lambda = 1$ , the vector  $\lambda$  could only be one-hot vectors, i.e.  $e_i, \forall i \in [K]$ . This proves  $\mathbf{u}_M$  must be the same as one of  $\mathbf{u}_i, i \in [K]$ .

**Wrapping-up: Unique  $\mathbf{T}$**  From Step III, we know that, if  $M = K$ , we have a unique  $\mathbf{T}$  under the assumption that  $\mathbf{T}$  is informative and non-singular. Step IV proves the  $M$ -th ( $M > K$ ) vector  $\mathbf{u}$  must be identical to one of  $\mathbf{u}_i, i \in [K]$ , indicating we only have  $M = K$  non-repetitive  $\mathbf{u}$  vectors. Therefore, our consensus equations are sufficient for guaranteeing a unique  $\mathbf{T}$ . Besides, note there is no approximation applied during the whole proof. Thus with a perfect knowledge of  $c^{[\nu]}, \nu = 1, 2, 3$ , the unique  $\mathbf{T}$  satisfying the consensus equations is indeed the true noise transition matrix.

## B.2. Feasibility of Assumption $|E_3^*| = \Theta(N)$

We discuss the feasibility of our assumption on the number of 3-tuples. According to the definition of  $E_3^*$ , we know there are no more than  $|E_3^*| \leq \lfloor N/3 \rfloor$  feasible 3-tuples. Strictly deriving the lower bound for  $|E_3^*|$  is challenging due to the unknown distributions of representations. To roughly estimate the order of  $|E_3^*|$  (i.e., the maximum number of non-overlapping 3-tuples), we consider a special scenario where those high-dimensional representations could be mapped to a 2-D square of width  $\sqrt{N/3}$ , each grid of width 1 has exactly 3 mapped representations, and one mapped representation is at the center of each grid (also the center of each circle). Consider a particular construction of feasible 3-tuples as illustrated in Figure 4. We require that, for each grid, the 2-NN fall in the corresponding circle. Otherwise, they may become the 2-NN of representations in other nearby grids. Assume the 2-NN are independently and uniformly distributed in the unit square, thus the probability of both 2-NN falling in the circle is  $(\pi/4)^2$ . Noting there are  $N/3$  grids in the big square illustrated in Figure 4, the expected number of feasible 3-tuples in this case is  $\frac{\pi^2}{48} \cdot N = \Theta(N)$ . Although this example only considers a special case, it demonstrates the order of  $|E_3^*|$  could be  $\Theta(N)$  with appropriate representations.

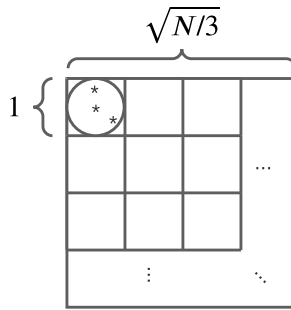

Figure 4. Illustration of a special case.

## B.3. Proof for Lemma 1

Then we present the proof for Lemma 1.

*Proof.* Recall in Eqn. (7), each high-order consensus pattern could be estimated by the sample mean of  $|E_3^*|$  independent and identically distributed random variables, thus according to Hoeffding's inequality (Hoeffding, 1963), w.p.  $1 - \delta$ , we have

$$|\hat{c}^{[i]}[j] - c^{[i]}[j]| \leq \sqrt{\frac{\ln \frac{2}{\delta}}{2|E_3^*|}}, i = 1, 2, 3, \forall j,$$

which is at the order of  $O(\sqrt{\ln(1/\delta)/N})$ .  $\square$

#### B.4. Proof for Theorem 2

Consider a particular uniform off-diagonal matrix  $\mathbf{T}$ , where the off-diagonal elements are  $T_{ij} = \frac{1-T_{ii}}{K-1}$ . Recall the clean prior probability for the  $i$ -th class is  $p_i$ . To find the upper bound for the sample complexity, we can only consider a subset of our consensus equations. Specifically, we consider the equations related to the  $i$ -th element of Eqn. (2) and Eqn. (3) when  $r = 0$ . Then a solution to our consensus equations will need to satisfy at least the following two equations:

$$\hat{p}_i \hat{T}_{ii} + (1 - \hat{p}_i) \frac{1 - \hat{T}_{ii}}{K - 1} = \hat{c}_1, \quad (16)$$

$$\hat{p}_i \hat{T}_{ii}^2 + (1 - \hat{p}_i) \frac{(1 - \hat{T}_{ii})^2}{(K - 1)^2} = \hat{c}_2, \quad (17)$$

where  $\hat{p}_i$  and  $\hat{T}_{ii}$  denote the estimated clean prior probability and noisy transition matrix,  $\hat{c}_1$  and  $\hat{c}_2$  denote the corresponding estimates of first- and second-order statistics. Lemma 1 shows, with probability  $1 - \delta$ :

$$|\hat{c}_i - c_i| \leq O\left(\sqrt{\frac{\ln(1/\delta)}{N}}\right).$$

Multiplying both sides of Eqn. (16) by  $T_{ii}$  and adding Eqn. (17), we have

$$K(K-1)\hat{p}_i\hat{T}_{ii}^2 + (1-\hat{p}_i)(1-\hat{T}_{ii}) = (K-1)\hat{c}_1\hat{T}_{ii} + (K-1)^2\hat{c}_2.$$

Note the above equality also holds for the true values  $p_i, T_{ii}, c_1, c_2$ . Taking the difference we have

$$\begin{aligned} & (\hat{T}_{ii} - T_{ii})(K(K-1)p_i(T_{ii} + \hat{T}_{ii}) - (1-p_i) - (K-1)c_1) \\ &= (K-1)^2(\hat{c}_2 - c_2) + (K-1)(\hat{c}_1 - c_1)\hat{T}_{ii} - K(K-1)\hat{T}_{ii}^2(\hat{p}_i - p_i) - (\hat{T}_{ii} - 1)(\hat{p}_i - p_i). \end{aligned}$$

Taking the absolute value for both sides yields

$$\begin{aligned} & |\hat{T}_{ii} - T_{ii}| \cdot |K(K-1)p_i(T_{ii} + \hat{T}_{ii}) - (1-p_i) - (K-1)c_1| \\ & \leq (K-1)^2|\hat{c}_2 - c_2| + (K-1)|\hat{c}_1 - c_1| + (K(K-1) + 1)|\hat{p}_i - p_i| \end{aligned}$$

From Eqn. (16), we have

$$\hat{p}_i = \frac{K-1}{K} \frac{\hat{c}_1 - 1/K}{\hat{T}_{ii} - 1/K} + \frac{1}{K}.$$

Thus

$$|\hat{p}_i - p_i| \leq \frac{K-1}{K} \frac{|\hat{c}_1 - c_1|}{\min(\hat{T}_{ii}, T_{ii}) - 1/K},$$

indicating  $|\hat{p}_i - p_i|$  is at the order of  $|\hat{c}_1 - c_1|$ . Note that

$$K(K-1)p_i(T_{ii} + \hat{T}_{ii}) - (1-p_i) - (K-1)c_1 \geq K(K-1)p_iT_{ii} - (1-p_i) - (K-1)c_1.$$

When  $K(K-1)p_iT_{ii} - (1-p_i) - (K-1)c_1 > 0$ , we have

$$|\hat{T}_{ii} - T_{ii}| \leq \frac{(K-1)^2|\hat{c}_2 - c_2| + (K-1)|\hat{c}_1 - c_1| + (K(K-1) + 1)\frac{K-1}{K} \frac{|\hat{c}_1 - c_1|}{\min(\hat{T}_{ii}, T_{ii}) - 1/K}}{K(K-1)p_iT_{ii} - (1-p_i) - (K-1)c_1}.$$

Then by union bound we know, w.p.  $1 - 2\delta$ , the estimation error  $|\hat{T}_{ii} - T_{ii}|$  is at the same order as  $|\hat{c}_i - c_i|$ , i.e.  $O(\sqrt{\frac{\ln(1/\delta)}{N}})$ .

## C. More Discussions

### C.1. Soft 2-NN Label Clusterability

The soft 2-NN label clusterability means one’s 2-NN may have a certain (but small) probability of belonging to different clean classes. Statistically, if we use a new matrix  $\mathbf{T}^{\text{soft}}$  to characterize the probability of getting a different nearest neighbor, i.e.  $T_{ij}^{\text{soft}} = \mathbb{P}(Y_2 = j | Y_1 = i) = \mathbb{P}(Y_3 = j | Y_1 = i)$ , the second-order consensus becomes  $\mathbf{c}_r^{[2]} := (\mathbf{T} \circ (\mathbf{T}^{\text{soft}} \mathbf{T}_r))^\top \mathbf{p}$  and the third-order consensus becomes  $\mathbf{c}_{r,s}^{[3]} := (\mathbf{T} \circ (\mathbf{T}^{\text{soft}} \mathbf{T}_r) \circ (\mathbf{T}^{\text{soft}} \mathbf{T}_s))^\top \mathbf{p}$ . Specifically, if  $T_{ij}^{\text{soft}} = e, \forall i \neq j$  and  $T_{ii}^{\text{soft}} = 1 - (K - 1)e, 0 \leq e < 1/K$ , where  $e$  captures the small perturbation of the 2-NN assumption, our solution will likely output a transition matrix that affects the label noise between the effects of  $\mathbf{T}^{\text{soft}} \mathbf{T}$  and  $\mathbf{T}$ . The above observation informs us that our estimation will be away from the true  $\mathbf{T}$  by at most a factor  $e$ . When  $e = 0$ , we recover the original 2-NN label clusterability condition.

### C.2. Local $T(X)$

**Sparse regularizer** Compared with estimating one global  $\mathbf{T}$  using the whole dataset of size  $N$ , each local estimation will have access to only  $M$  instances, where  $M \ll N$ . Thus the feasibility of returning an accurate  $\mathbf{T}(x_n)$  requires more consideration. In some particular cases, e.g., HOC Local in Table 1, when  $\mathbf{p}$  is sparse due to the local datasets, we usually add a regularizer to ensure a sparse  $\mathbf{p}$ , such as  $\sum_{i \in [K]} \ln(c_i + \varepsilon), \varepsilon \rightarrow 0_+$ , where  $c_i$  is the  $i$ -th element of  $\mathbf{p}$ . Note the standard sparse regularizer, i.e.  $\ell_1$ -norm  $\|\mathbf{p}\|_1$ , could not be applied here since  $\|\mathbf{p}\|_1 = 1$ . Therefore, with a regularizer that shrinks the search space and fewer variables, we could get an accurate estimate of  $T(X)$  with a small  $M$ .

**Other extensions** Even with  $M$ -NN noise clusterability, estimating  $\mathbf{T}(X)$  for the whole dataset requires executing Algorithm 1 a numerous number of times ( $\sim N/M$ ). If equipped with prior knowledge that the label noise can be divided into several groups and  $\mathbf{T} = \mathbf{T}(X)$  within each group (Xia et al., 2020b; Wang et al., 2021), we only need to estimate  $\mathbf{T}$  for each group by treating instances in each group as a local dataset and directly apply Algorithm 1. As a preliminary work on estimating  $\mathbf{T}$  relying on clusterability, the focus of this paper is to provide a generic method for estimating  $\mathbf{T}$  given a dataset. Designing efficient algorithms to split the original dataset into a tractable number of local datasets is interesting for future investigation.

### C.3. Feasibility of Assumption 1 and Assumption 2

1. Denote the confusion matrix by  $\mathbf{C}[h]$ , where each element is  $C_{ij}[h] := \mathbb{P}(Y = i, h(X) = j)$  and  $h(X) = j$  represents the event that the classifier predicts  $j$  given feature  $X$ . Then the noisy confusion matrix could be written as  $\tilde{\mathbf{C}}[h] := \mathbf{T}^\top \mathbf{C}[h]$ . If  $\mathbf{T}$  is non-singular (a.k.a. invertible), statistically, we can always find the inverse matrix  $\mathbf{T}^{-1}$  such that the clean confusion matrix could be recovered as  $\mathbf{C}[h] = (\mathbf{T}^{-1})^\top \tilde{\mathbf{C}}[h]$ . Otherwise, we may think the label noise is too “much” such that the clean confusion matrix is not recoverable by  $\mathbf{T}$ . Then learning  $\mathbf{T}$  may not be meaningful anymore. Therefore, Assumption 1 is effectively ensuring the necessity of estimating  $\mathbf{T}$ .
2. We require  $T_{ii} > T_{ij}$  in Assumption 2 to ensure instances from observed class  $i$  (observed from noisy labels) are informative (Liu & Chen, 2017). Intuitively, this assumption characterizes a particular permutation of row vectors in  $\mathbf{T}$ . Otherwise, there may exist  $K!$  possible solutions by considering all the permutations of  $K$  rows (Liu et al., 2020).

## D. More Detailed Experiment Settings

### D.1. Generating the Instance-Dependent Label Noise

In this section, we introduce how to generate instance-based label noise, which is illustrated in Algorithm 2. Note this algorithm follows the state-of-the-art method (Xia et al., 2020b; Zhu et al., 2021). Define the noise rate (the global flipping rate) as  $\eta$ . To calculate the probability of  $x_n$  mapping to each class under certain noise conditions, we set sample instance flip rates  $q_n$  and sample parameters  $W$ . The size of  $W$  is  $S \times K$ , where  $S$  denotes the length of each feature.

First, we sample instance flip rates  $q_n$  from a truncated normal distribution  $\mathbf{N}(\eta, 0.1^2, [0, 1])$  in Line 2. The average flipping rate (a.k.a. average noise rate) is  $\eta$ .  $q_n$  avoids all the instances having the same flip rate. Then, in Line 3, we sample parameters  $W$  from the standard normal distribution for generating the instance-dependent label noise. Each column of  $W$  acts as a projection vector. After acquiring  $q_n$  and  $W$ , we can calculate the probability of getting a wrong label for each

**Algorithm 2** Instance-Dependent Label Noise Generation

---

**Input:**

1: Clean examples  $(x_n, y_n)_{n=1}^N$ ; Noise rate:  $\eta$ ; Size of feature:  $1 \times S$ ; Number of classes:  $K$ .

**Iteration:**

2: Sample instance flip rates  $q_n$  from the truncated normal distribution  $\mathcal{N}(\eta, 0.1^2, [0, 1])$ ;

3: Sample  $W \in \mathcal{R}^{S \times K}$  from the standard normal distribution  $\mathcal{N}(0, 1^2)$ ;

**for**  $n = 1$  to  $N$  **do**

4:  $p = x_n \cdot W$  // Generate instance dependent flip rates. The size of  $p$  is  $1 \times K$ .

5:  $p_{y_n} = -\infty$  // Only consider entries that are different from the true label

6:  $p = q_n \cdot \text{SoftMax}(p)$  // Let  $q_n$  be the probability of getting a wrong label

7:  $p_{y_n} = 1 - q_n$  // Keep clean w.p.  $1 - q_n$

8: Randomly choose a label from the label space as noisy label  $\tilde{y}_n$  according to  $p$ ;

**end for**

**Output:**

9: Noisy examples  $(x_i, \tilde{y}_n)_{n=1}^N$ .

---

instance  $(x_n, y_n)$  in Lines 4 – 6. Note that in Line 5, we set  $p_{y_n} = -\infty$ , which ensures that  $x_n$  will not be mapped to its own true label. In addition, Line 7 ensures the sum of all the entries of  $p$  is 1. Suppose there are two features:  $x_i$  and  $x_j$  where  $x_i = x_j$ . Then the possibility  $p$  of these two features, calculated by  $x \cdot W$ , from the Algorithm 2, would be exactly the same. Thus the label noise is strongly instance-dependent.

Note Algorithm 2 cannot ensure  $T_{ii}(X) > T_{ij}(X)$  when  $\eta > 0.5$ . To generate an informative dataset, we set  $0.9 \cdot T_{ii}(X)$  as the upper bound of  $T_{ij}(X)$  and distribute the remaining probability to other classes.

**D.2. Basic Hyper-Parameters**

To testify the classification performance, we adopt the flow: 1) Pre-training  $\rightarrow$  2) Global Training  $\rightarrow$  3) Local Training. Our HOC estimator is applied once at the beginning of each above step. Each training stage re-trains the model. In Stage-1, we load the standard ResNet50 model pre-trained on ImageNet to obtain basic representations. At the beginning of Stage-2 and Stage-3, we use the representations given by the current model. All experiments are repeated three times. *HOC Global* only employs one global  $T$  with  $G = 50$  and  $|E| = 15k$  as inputs of Algorithm 2. *HOC Local* uses 300 local matrices (250-NN noise clusterability,  $|D_{h(n)}| = 250$ ,  $G = 30$ ,  $|E| = 100$ ) for CIFAR-10 and 5 local matrices (10k-NN noise clusterability,  $|D_{h(n)}| = 10k$ ,  $G = 30$ ,  $|E| = 5k$ ) for CIFAR-100. Note the local matrices may not cover the whole dataset. For those uncovered instances, we simply apply  $T$ .

**Other hyperparameters:**

- Batch size: 128 (CIFAR), 32 (Clothing1M)
- Learning rate:
  - CIFAR-10: Pre-training: 0.1 for 20 epochs  $\rightarrow$  0.01 for 20 epochs. Global Training: 0.1 for 20 epochs  $\rightarrow$  0.01 for 20 epochs. Local Training: 0.1 for 60 epochs  $\rightarrow$  0.01 for 60 epochs  $\rightarrow$  0.001 for 60 epochs.
  - CIFAR-100: Pre-training: 0.1 for 30 epochs  $\rightarrow$  0.01 for 30 epochs. Global Training: 0.1 for 30 epochs  $\rightarrow$  0.01 for 30 epochs. Local Training: 0.1 for 30 epochs  $\rightarrow$  0.01 for 30 epochs  $\rightarrow$  0.001 for 30 epochs.
  - Clothing1M: 0.01 for 25 epochs  $\rightarrow$  0.001 for 25 epochs  $\rightarrow$  0.0001 for 15 epochs  $\rightarrow$  0.00001 for 15 epochs (Pre-training, Global training, and local training)
- Momentum: 0.9
- Weight decay: 0.0005 (CIFAR) and 0.001 (Clothing1M)
- Optimizer: SGD (Model training) and Adam with initial a learning rate of 0.1 (solving for  $T$ )

For each epoch in Clothing1M, we sample 1000 mini-batches from the training data while ensuring the (noisy) labels are balanced. The global  $T$  is obtained by an average of  $T$  from 5 random epochs. We only use  $T(X) = T$  in local training. Estimating local transition matrices using HOC on Clothing1M is feasible, e.g., assuming  $M$ -NN noise clusterability, but it may be time-consuming to tune  $M$ . Noting our current performance is already satisfying, and the focus of this paper is on the ability to estimate  $T$ , we leave the combination of  $T(X)$  with loss correction or other advanced techniques for future



**Algorithm 3** Local Datasets Generation

**Input:**

 1: Maximal rounds:  $G'$ . Local dataset size:  $L$ . Noisy dataset:  $\tilde{D} = \{(x_n, \tilde{y}_n)\}_{n \in [N]}$ . Noisy dataset size:  $|D|$ .

**Iteration:**

 2: Initialize the  $|D|$ -dimensional index list:  $S = \mathbf{1}$ 
**for**  $k = 1$  to  $G'$  **do**
**if**(size( $S[S > 0]$ )  $> 0$ ) **then**

 3:  $\text{Idx}_{\text{selected}} = \text{random.choice}(S[S > 0])$  // Choose a local center index randomly from the unselected index of  $\tilde{D}$ .

**else**

 4:  $\text{Idx}_{\text{selected}} = \text{random.randint}(0, |D|)$  // If the selected index has covered  $\tilde{D}$ , we choose local center randomly.

**end if**

 5:  $\text{Idx}_{\text{local}} = \text{SelectbyDist}(\text{Idx}_{\text{selected}}, L)$  // Select the index of  $L$  features closest to  $\text{Idx}_{\text{selected}}$ .

 6:  $S[\text{Idx}_{\text{local}}] = -1$  // Mark the state of the selected index in  $S$  to avoid duplicate selection.

 7:  $\tilde{D}_k = \tilde{D}[\text{Idx}_{\text{local}}]$  // Build a local dataset by selecting  $(x_i, \tilde{y}_i), i \in \text{Idx}_{\text{local}}$ .

**end for**
**Output:**

 8: Local Datasets  $\tilde{D}_k = \{(x_n, \tilde{y}_n)\} \cup \{(x_{n_1}, \tilde{y}_{n_1}), \dots, (x_{n_M}, \tilde{y}_{n_M})\}, n_i, k \in [L], i \in [M]$ .
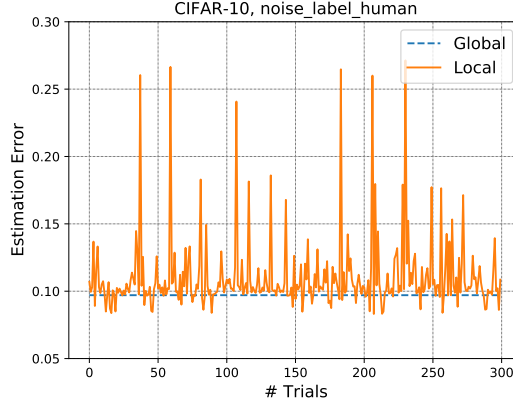

Figure 5. Illustration of the global and local estimation errors. Global estimation error: 0.0970. Local estimation errors: mean = 0.1103, standard deviation = 0.0278.

works.

**D.3. Global and Local Estimation Errors on CIFAR-10 with Human Noise**

Algorithm 3 details the generation of local datasets. Notice the fact that the  $i$ -th row of  $\mathbf{T}(x_n)$  could be any feasible values when  $p_i = 0$ , so as the estimates  $\hat{\mathbf{T}}_{\text{local}}$ . In such case, we need to refer to  $\mathbf{T}$  to complete the information. Particularly, we calculate the weighted average value with the corresponding  $\hat{\mathbf{T}}$  as

$$\hat{\mathbf{T}}_{\text{local}}[i] = (1 - \zeta + \hat{p}_i)\hat{\mathbf{T}}_{\text{local}}[i] + (\zeta - \hat{p}_i)\hat{\mathbf{T}}[i],$$

where  $\hat{\mathbf{T}}_{\text{local}}[i]$  and  $\hat{\mathbf{T}}[i]$  denote the  $i$ -th row of estimates  $\hat{\mathbf{T}}_{\text{local}}$  and  $\hat{\mathbf{T}}$ ,  $\hat{p}_i$  denotes the estimated clean prior probability of class- $i$  given the local dataset. We use  $\zeta = 1$  for local estimates of CIFAR-10, and  $\zeta = 0.5$  for local estimate of CIFAR-100.

Figure 5 illustrates the variation of local estimation errors on CIFAR-10 with human noise using HOC.
